# Supplementary material for: Effects of Mindfulness-Based Parallel-Group Interventions on Family Functioning and Child and Parent Mental Health: a Systematic Review and Meta-analysis
Source: Springer Nature journal article supplement (doi:10.1007/s12671-021-01728-z), 2021-08-24
Supplement: MOESM1 [file 19596984]

**Appendix I.**

***Risk of bias across the included studies***

| **(a) Quality assessment of randomized controlled trials** | | | | | | | | | |
| --- | --- | --- | --- | --- | --- | --- | --- | --- | --- |
| **Study name** | **Was the assignment to the treatment groups really random?** | **Was the treatment allocation concealed?** | **Were the groups similar at baseline in terms of prognostic factors?** | **Were the eligibility criteria specified?** | **Were outcome assessors blinded to treatment allocation?** | **Was the care provider (i.e. intervention facilitator) blinded?** | **Was the patient (i.e. participant) blinded?** | **Were the point estimates and measure of variability presented for the primary outcome**  **measure?** | **Did the analyses include an intention to treat analysis?** |
| Hancock et al. (2018) | Low risk | Low risk | Low risk | Low risk | Unclear risk | Unclear risk | Unclear risk | Low risk | Low risk |
| Jackman et al. (2019) | Unclear risk | Unclear risk | Unclear risk | Low risk | Unclear risk | Unclear risk | Unclear risk | Low risk | High risk |
| Kumar et al. (2018) | Low risk | Low risk | Low risk | Low risk | Unclear risk | Unclear risk | High risk | Low risk | High risk |
| Lo et al. (2017) | Low risk | Low risk | Low risk | Low risk | Low risk | Unclear risk | Unclear risk | Low risk | Low risk |
| Lo et al. (2019) | Low risk | Low risk | Low risk | Low risk | Low risk | Unclear risk | High risk | Low risk | Low risk |
| **(b) Quality assessment of quasi-experimental studies** | | | | | | | | | |
| **Study name** | **Selection of participants** | **Confounding variables** | **Measurement of exposure** | **Blinding of outcome assessment** | **Incomplete outcome data addressed** | **Free of selective reporting** |  |  |  |
| López-Alarcón et al. (2020) | Low risk | High risk | Low risk | Unclear risk | Low risk | Low risk |  |  |  |
| **(c) Quality assessment of single-group studies** | | | | | | | | | |
| **Study name** | **Selection of participants** | **Confounding variables** | **Measurement of exposure** | **Blinding of outcome assessment** | **Incomplete outcome data addressed** | **Free of selective reporting** |  |  |  |
| Bögels et al. (2008) | Low risk | Low risk | High risk | Unclear risk | Low risk | High risk |  |  |  |
| de Bruin et al. (2015) | Low risk | Unclear risk | High risk | Unclear risk | Low risk | Low risk |  |  |  |
| Haydicky et al. (2015) | Low risk | Low risk | High risk | Unclear risk | Low risk | High risk |  |  |  |
| Heifetz et al. (2017) | Low risk | Unclear risk | High risk | Unclear risk | Low risk | Low risk |  |  |  |
| Martin et al. (2016) | Low risk | Unclear risk | Low risk | Unclear risk | Low risk | Low risk |  |  |  |
| Racey et al. (2018) | Low risk | Unclear risk | High risk | Unclear risk | Low risk | Low risk |  |  |  |
| Ridderinkhof et al. (2018) | Low risk | Unclear risk | High risk | Unclear risk | Unclear risk | Low risk |  |  |  |
| Salem-Guirgis et al. (2019) | Low risk | Low risk | High risk | Unclear risk | Unclear risk | Low risk |  |  |  |
| Shaffer et al. (2019) | High risk | Unclear risk | High risk | Unclear risk | Low risk | Low risk |  |  |  |
| Tronieri et al. (2019) | Low risk | Unclear risk | Low risk | Unclear risk | Low risk | Low risk |  |  |  |
| van de Weijer-Bergsma et al. (2012) | Low risk | Unclear risk | Low risk | Unclear risk | Low risk | Low risk |  |  |  |
| van der Oord et al. (2012) | Low risk | Low risk | High risk | Unclear risk | Low risk | Low risk |  |  |  |
| Zhang et al. (2017) | Low risk | Unclear risk | Low risk | Unclear risk | Low risk | Low risk |  |  |  |

**Appendix II.**

***Outcome measures and references***

**Outcome measures of family functioning included:**

**(1) Parenting behaviors, assessed with**

- Interpersonal Mindfulness Parenting Scale (IM-P; Duncan, Coatsworth, & Greenberg, 2009);
- Parental Acceptance and Action Questionnaire (PAAQ; Cheron, Ehrenreich, & Pincus, 2009);
- Parenting Scale (PS; Arnold, O’Leary, Wolff, & Acker, 1993).

**(2) Family functioning or relations, assessed with**

- Conners—3rd Edition: Family relations (Conners, 2008);
- Family Adaptation, Partnership, Growth, Affection, Resolve Scale (APGAR; Smilkstein, Ashworth, & Montano, 1982);
- Family Assessment Device (FAD; Epstein, Baldwin, & Bishop, 1983);
- Issues Checklist (IC; Prinz et al., 1979); and
- Pediatric Quality of Life Inventory: family functioning (PedsQL; Varni, Sherman, Burwinkle, Dickinson, & Dixon, 2004).

**Outcome measures of parental mental health included:**

**(1) Emotion Regulation, assessed with**

- Adult Self Report (ASR) of the ASEBA (Verhulst & van der Ende, 2013);
- Beck Depression Inventory-II (Beck, Steer, & Brown, 1996);
- Brief Symptom Index (Derogatis, 2000);
- Parenting Stress Index (PSI; Abidin, 1983);
- Patient Health Questionnaire (PHQ-9; Kroenke, Spitzer, & Williams, 2001);
- Perceived Stress Scale (PSS-14; Cohen, Kamarck & Mermelstein, 1983); and
- Stress Index for Parents of Adolescents (SIPA; Sheras, Abidin, & Konold, 1998).

**(2) Flexibility and ability to cope with Adversity, assessed with**

- Acceptance and Action Questionnaire (AAQ; Hayes et al., 2004);
- Parent Acceptance of Pediatric Illness Questionnaire (PAPIQ; Masuda, Cohen, Wicksell, Kemani, & Johnson, 2011); and
- Ruminative Response Scale (RRS; Nolen-Hoeksema, 2000).

**(3) Harmonious Relationship between Body and Mind, assessed with**

- Experiences Questionnaire Decentering Subscale (Fresco et al., 2007);
- Five Facet Mindfulness Questionnaire (FFMQ; Bohlmeijer, ten Klooster, Fledderus, Veehof, & Baer, 2011);
- Mindful Attention and Awareness Scale (MAAS; Brown & Ryan, 2003);
- Philadelphia Mindfulness Scale (PHLMS; Cardaciotto, Herbert, Forman, Moitra, & Farrow, 2008); and
- Self-Compassion Scale (Neff, 2015).

**(4) Overall Mental Health, assessed with**

- Psychological well-being scale (Ryff, 1989);
- Short-Form Health Survey-36 Item (SF-36; Ware & Sherbourne, 1992); and
- World Health Organization Well-Being Index (WHO-5; Bech, Olsen, Kjoller, & Rasmussen, 2003).

**Outcome measures of child mental health included:**

**(1) Cognitive Skills, assessed with**

- Behavior Assessment System for Children, Second Edition: Inattention/Hyperactivity (BASC-2; Reynolds & Kamphaus, 2004);
- Child Behavior Checklist: thought and attention (CBCL; Achenbach, 1991a);
- Conners’ Continuous Performance Test 3rd Edition (CPT 3; Conners, 2015);
- Conners-3rd Edition (Conners, 2008);
- D2 attention test (Brinckenkamp, 1994);
- Strengths and Weaknesses of ADHD Symptoms and Normal Behaviors Rating Scale (SWAN; Swanson et al., 2012);
- Teacher Report Form: attention (TRF; Verhulst, van der Ende, & Koot, 1997);
- Test of Everyday Attention for Children (TEA-Ch; Heaton et al., 2001); and
- Youth Self Report: thought and attention (YSR; Achenbach, 1991b).

**(2) Social Skills, assessed with**

- Autism Questionnaire (AQ; Hoekstra et al., 2010);
- Child Behavior Checklist: Social problem, withdrawn (CBCL; Achenbach, 1991a);
- Children’s Social Behavior Questionnaire (CSBQ; Luteijn, Luteijn, Jackson, Volkmar & Minderaa, 2000);
- Conners-3rd Edition: peer relation (Conners, 2008);
- Social Responsiveness Scale (SRS; Constantino et al., 2003); and
- Youth Self Report: Social problem (YSR; Achenbach, 1991b).

**(3) Emotion Regulation, assessed with**

- Anxiety Disorders Interview Schedule for Children for DSM-IV (ADIS-IV) Clinical Severity Rating (CSR; American Psychiatric Association, 2000);
- Beck Depression Inventory-II (Beck, Steer, & Brown, 1996);
- Behavior Assessment System for Children, Second Edition: internalizing problem (BASC-2; Reynolds & Kamphaus, 2004);
- Center for Epidemiological Scales, Depression (CES-D; Radloff, 1977);
- Chronic Stress Questionnaire for Children and Adolescents (CSQ-CA; de Bruin et al., 2018);
- Child Behavior Checklist: internalizing, anxious/depressed (CBCL; Achenbach, 1991a);
- Depression, Anxiety, and Stress Scale (DASS-21; Lovibond, 1995);
- Emotion Regulation Checklist (ERC; Shields & Cicchetti, 1997);
- Emotion Regulation Questionnaire-Child (ERQ-CA; Gullone & Taffe, 2012);
- Multidimensional Anxiety Scale for Children (MASC; Rynn et al., 2006);
- Pain Anxiety Symptoms Scale-20 (PASS; McCracken & Dhingra, 2002);
- Patient Health Questionnaire for Adolescents (PHQ-A; Johnson, Harris, Spitzer, & Williams, 2002);
- Penn State Worry Questionnaire (PSWQ; Meyer, Miller, Metzger, & Borkovec, 1990);
- Perceived Stress Scale (PSS-14; Cohen, Kamarck, & Mermelstein, 1983);
- Revised Child Anxiety and Depression Scale—Youth and Parent Report (RCADS; Chorpita, Moffitt, & Gray, 2005);
- Spence Self-report Questionnaire (Spence, Barrett, & Turner, 2003);
- Teacher Report Form: internalizing (TRF; Verhulst, van der Ende, & Koot, 1997); and
- Youth Self Report: internalizing (YSR; Achenbach, 1991b).

**(4) Flexibility and ability to cope with Adversity, assessed with**

- Acceptance and Action Questionnaire (AAQ; Hayes et al., 2004);
- Avoidance and Fusion Questionnaire for Youths (AFQ-Y; Greco, Lambert, & Baer, 2008);
- Chronic Pain Acceptance Questionnaire-Adolescent Version (CPAQ-A; Wallace, Harbeck-Weber, Whiteside, & Harrison, 2011);
- Children’s Anxiety Life Interference Scale (CALIS; Lyneham et al., 2013);
- Functional Disability Index (FDI; McGrath et al., 2008);
- Impact of Pediatric Illness Scale (IPI; Wolters et al., 2013);
- Modified Brief Pain Inventory (MBPI; Engel, Kartin, Carter, Jensen, & Jaffe, 2009);
- Pain Interference Index (PII; Martin et al., 2015); and
- Ruminative Response Scale (RRS; Nolen-Hoeksema, 2000).

**(5) Harmonious Relationship between Body and Mind, assessed with**

- Children’s Acceptance and Mindfulness Measure, Dutch version (CAMM; de Bruin et al. 2014);
- Child Behavior Checklist: Somatic complaints (CBCL; Achenbach, 1991a);
- Experiences Questionnaire Decentering Subscale (Fresco et al., 2007);
- Mindful Attention and Awareness Scale (MAAS; Brown & Ryan, 2003);
- Mindful Attention and Awareness Scale–Adolescent version (MAAS-A; Brown, West, Loverich, & Biegel, 2011);
- Mindful Eating Questionnaire (MEQ; Framson et al., 2009); and
- Self-Compassion Scale (Neff, 2015).

**(6) Overall Mental Health, assessed with**

- Child Health Questionnaire (CHQ; Landgraf, Abetz, & Ware, 1999);
- Pediatric Quality of Life Inventory: quality of life (PedsQL; Varni et al., 2004);
- Subjective Happiness Scale (SHS; Lyubomirsky & Lepper, 1999); and
- World Health Organization–Five Well-Being Index (WHO-5; Bech, Olsen, Kjoller, & Rasmussen, 2003).

**References**

Achenbach, T. M. (1991a). *Manual for the Child Behavior Checklist/4-18 and 1991 Profile.* Burlington: University of Vermont.

Achenbach, T. M. (1991b). *Manual for the Youth Self-report and 1991 Profile.* Burlington: University of Vermont.

Abidin, R. R. (1983). *Parenting Stress Index: Manual.* Charlottesville, VA: Pediatric Psychology Press.

American Psychiatric Association. (2000). *Diagnostic and statistical manual of mental disorders (4th ed., text rev.)*. doi:10.1176/appi.books.9780890423349

Arnold, D. S., O’Leary, S. G., Wolff, L. S., & Acker, M. M. (1993). The Parenting Scale: A measure of dysfunctional parenting in discipline situations. *Psychological Assessment, 5(2),* 137–144. doi:10.1037/1040-3590.5.2.137

Beck, A., Steer, R., & Brown, G. (1996). *The Beck Depression Inventory (2nd ed.).* San Antonio, TX: The Psychological Corporation

Bech, P., Olsen, L. R., Kjoller, M., & Rasmussen, N. K. (2003). Measuring well-being rather than the absence of distress symptoms: a comparison of the SF-36 Mental Health subscale and the WHO-Five well-being scale. *International Journal of Methods in Psychiatric Research, 12*(2), 85–91. doi:10.1002/mpr.145

Bohlmeijer, E., ten Klooster, P. M., Fledderus, M., Veehof, M., & Baer, R. (2011). Psychometric properties of the Five Facet Mindfulness Questionnaire in depressed adults and development of a short form. *Assessment, 18*, 308–320. doi:10.1177/1073191111408231

Brickenkamp, R. (1994). *Test d2. Aufmerksamkeits-Belastungs-Test (8. auflage).* Gottingen: Hogrefe.

Brown, K. W., & Ryan, R. M. (2003). The benefits of being present: Mindfulness and its role in psychological well-being. *Journal of Personality and Social Psychology, 84*(4), 822–848. doi:10.1037/0022-3514.84.4.822

Brown, K. W., West, A. M., Loverich, T. M., & Biegel, G. M. (2011). Assessing adolescent mindfulness: Validation of an adapted mindful attention awareness scale in adolescent normative and psychiatric populations. *Psychological Assessment, 23*(4), 1023–1033. doi: 10.1037/a0021338

Cardaciotto, L., Herbert, J. D., Forman, E. M., Moitra, E., & Farrow, V. (2008). The assessment of present-moment awareness and acceptance: The Philadelphia mindfulness scale. *Assessment, 15*(2), 204–223. doi: 10.1177/1073191107311467

Cheron, D.M., Ehrenreich, J. T. and Pincus, D. B. (2009). Assessment of parental experiential avoidance in a clinical sample of children with anxiety disorders. *Child Psychiatry and Human Development, 40*, 383–403. doi: 10.1007/s10578-009-0135-z

Chorpita, B. F., Moffitt, C. E., & Gray, J. (2005). Psychometric properties of the revised child anxiety and depression scale in a clinical sample. *Behaviour Research and Therapy, 43*, 309–322. doi:10.1016/j.brat.2004.02.004

Cohen, S., Kamarck, T. and Mermelstein, R. (1983). A global measure of perceived stress. *Journal of Health and Social Behavior, 24*, 385–396. doi: 10.2307/2136404

Conners, C. K. (2015). *Conners Continuous Performance Test 3rd edition™ (Conners CPT 3™), Conners Continuous Auditory Test of Attention (Conners CATA™) manual.* Canada: Multi-Health Systems Incorporated.

Conners, C. K. (2008). *Conners-3rd edition.* Toronto, ON: MultiHealth Systems Inc.

Constantino, J. N., Davis, S. A., Todd, R. D., Schindler, M. K., Gross, M. M., Brophy, S. L., . . . Reich, W. (2003). Validation of a brief quantitative measure of autistic traits: Comparison of the social responsiveness scale with the autism diagnostic interview-revised. *Journal of Autism and Developmental Disorders, 33*(4), 427–433. doi: 10.1023/A:1025014929212

de Bruin, E. I., Zijlstra, B. J. H., & Bögels, S. M. (2014). The meaning of mindfulness in children and adolescents: Further validation of the child and adolescent mindfulness measure (CAMM) in two independent samples from the Netherlands. *Mindfulness, 5*(4), 422–430. doi: 10.1007/s12671-013-0196-8

de Bruin, E. I., Sieh, D. S., Zijlstra, B. J., & Meijer, A. M. (2018). Chronic childhood stress: psychometric properties of the chronic stress questionnaire for children and adolescents (CSQ-CA) in three independent samples. *Child indicators research*, *11*(4), 1389–1406.

Derogatis, L. (2000). *Brief symptom inventory 18 Minneapolis*, MN: National Computer Systems, Inc.

Duncan, L. G., Coatsworth, J. D., & Greenberg, M. T. (2009). A Model of Mindful Parenting: Implications for Parent–Child Relationships and Prevention Research. *Clinical Child and Family Psychology Review, 12*(3), 255–270. doi:10.1007/s10567-009-0046-3

Engel, J. M., Kartin, D., Carter, G. T., Jensen, M. P., & Jaffe, K. M. (2009). Pain in youths with neuromuscular disease. *American Journal of Hospice & Palliative Medicine, 26*(5), 405–412. doi: 10.1177/1049909109346165

Epstein, N., Baldwin, L. M., & Bishop, D. S. (1983). The McMaster family assessment device. *Journal of Marital and Family Therapy, 9*(2), 171–180. doi:10.1111/j.1752-0606.1983.tb01497.x

Framson, C., Kristal, A. R., Schenk, J. M., Littman, A. J., Zeliadt, S., & Benitez, D. (2009). Development and validation of the mindful eating questionnaire. *Journal of the American Dietetic Association, 109*(8), 1439–1444. doi: 10.1016/j.jada.2009.05.006

Fresco, D. M., Moore, M. T., van Dulmen, Manfred H. M., Segal, Z. V., Ma, S. H., Teasdale, J. D., & Williams, J. M. (2007). Initial psychometric properties of the experiences questionnaire: Validation of a self-report measure of decentering. *Behavior Therapy, 38*(3), 234–246. doi: 10.1016/j.beth.2006.08.003

Greco, L. A., Lambert, W. and Baer, R. A. (2008). Psychological inflexibility in childhood and adolescence: development and evaluation of the Avoidance and Fusion Questionnaire for Youth. *Psychological Assessment, 20*, 93–102. doi: 10.1037/1040-3590.20.2.93

Gullone, E., & Taffe, J. (2012). The emotion regulation questionnaire for children and adolescents (ERQ–CA): A psychometric evaluation. *Psychological Assessment, 24*(2), 409–417. doi: 10.1037/a0025777

Hayes, S. C., Strosahl, K. D., Wilson, K. G., Bissett, R. T., Pistorello, J., Toarmino, D., . . . McCurry, S. M. (2004). Measuring experiential avoidance: A preliminary test of a working model. *The Psychological Record, 54*, 553–578. <https://doi.org/10.1007/BF03395492>

Heaton, S. C., Reader, S. K., Preston, A. S., Fennell, E. B., Puyana, O. E., Gill, N., & Johnson, J. H. (2001). The Test of Everyday Attention for Children (TEA-Ch): Patterns of Performance in Children with ADHD and Clinical Controls. *Child Neuropsychology, 7*(4), 251–264. doi:10.1076/chin.7.4.251.8736

Hoekstra, R. A., Vinkhuyzen, A. A. E., Wheelwright, S., Bartels, M., Boomsma, D. I., Baron-Cohen, S., … van der Sluis, S. (2010). The Construction and Validation of an Abridged Version of the Autism-Spectrum Quotient (AQ-Short). *Journal of Autism and Developmental Disorders, 41*(5), 589–596. doi:10.1007/s10803-010-1073-0

Johnson, J. G., Harris, E. S., Spitzer, R. L. and Williams, J. B. W. (2002). The patient health questionnaire for adolescents: validation of an instrument for the assessment of mental disorders among adolescent primary care patients. *Journal of Adolescent Health, 30*, 196–204. doi: 10.1016/S1054-139X(01)00333-0

Kroenke, K., Spitzer, R. L., & Williams, J. B. W. (2001). The PHQ-9: Validity of a brief depression severity measure. *Journal of General Internal Medicine, 16*(9), 606-613. doi:10.1046/j.1525-1497.2001.016009606.x

Landgraf, J. M., Abetz, L., & Ware, J. E. (1999). *The CHQ user’s manual.* Boston, MA: Health Act.

Lovibond, P. F. (1995). *Manual for the depression anxiety stress scales.* Sydney: Sydney Psychology Edition.

Luteijn, E., Luteijn, F., Jackson, S., Volkmar, F., & Minderaa, R. (2000). The children's social behavior questionnaire for milder variants of PDD problems: Evaluation of the psychometric characteristics. *Journal of Autism and Developmental Disorders, 30*(4), 317-330. doi: 10.1023/A:1005527300247

Lyubomirsky, S., & Lepper, H. S. (1999). A measure of subjective happiness: Preliminary reliability and construct validation. *Social Indicators Research, 46*(2), 137-155. doi: 10.1023/A:1006824100041

Lyneham, H. J., Sburlati, E. S., Abbott, M. J., Rapee, R. M., Hudson, J. L., Tolin, D. F., & Carlson, S. E. (2013). Psychometric properties of the child anxiety life interference scale (CALIS). *Journal of Anxiety Disorders, 27*, 711–719. doi:10.1016/j.janxdis.2013.09.008

Martin, S., Schmitt, S. N., Wolters, P. L., Abel, B., Toledo‐Tamula, M. A., Baldwin, A., . . . Widemann, B. (2015). Development and validation of the English Pain Interference Index and Pain Interference Index‐Parent report. *Pain Medicine, 16*(2), 367–373. doi:10.1111/pme.12620

Masuda, A., Cohen, L. L., Wicksell, R. K., Kemani, M. K., & Johnson, A. (2011). A case study: Acceptance and commitment therapy for Pediatric Sickle Cell Disease. *Journal of Pediatric Psychology, 36*(4), 398–408. doi:10.1093/jpepsy/jsq118

McCracken, L. M., & Dhingra, L. (2002). A short version of the Pain Anxiety Symptoms Scale (PASS-20): Preliminary development and validity. *Pain Research and Management, 7*(1), 45–50. doi:10.1155/2002/517163

McGrath, P. J., Walco, G. A., Turk, D. C., Dworkin, R. H., Brown, M. T., Davidson, K., . . . Zeltzer, L. (2008). Core outcome domains and measures for pediatric acute and chronic/recurrent pain clinical trials: PedIMMPACT recommendations. *The Journal of Pain, 9*(9), 771–783. doi: 10.1016/j.jpain.2008.04.007

Meyer, T. J., Miller, M. L., Metzger, R. L., & Borkovec, T. D. (1990). Development and validation of the Penn State Worry Questionnaire. *Behaviour Research and Therapy, 28*(6), 487–495. doi: 10.1016/0005-7967(90)90135-6

Neff, K. (2015). The self-compassion scale is a valid and theoretically coherent measure of self-compassion. *Mindfulness, 7*, 264–274. <https://doi.org/10.1007/s12671-015-0479-3>

Nolen-Hoeksema, S. (2000). The role of rumination in depressive disorders and mixed anxiety/depressive symptoms. *Journal of Abnormal Psychology, 109*(3), 504–511. doi:10.1037/0021-843x.109.3.504

Prinz, R. J., Foster, S., Kent, R. N., & O’Leary, K. D. (1979). Multivariate assessment of conflict in distressed and non-distressed mother-adolescent dyads. *Journal of Applied Behavior Analysis, 12*, 691–700. doi:10.1901/jaba.1979.12-691.

Radloff, L. S. (1977). The CES-D scale: A self-report depression scale for research in the general population. *Applied Psychological Measurement, 1*(3), 385–401. doi: 10.1177/014662167700100306

Reynolds, C. R., & Kamphaus, R. W. (2004). *The behavior assessment system for children (2nd ed.).* Bloomington, MN: Pearson.

Ryff, C. D. (1989). Happiness is everything, or is it? Explorations on the meaning of psychological well-being. *Journal of Personality and Social Psychology, 57*(6), 1069–1081. doi:10.1037/0022-3514.57.6.1069

Rynn, M. A., Barber, J. P., Khalid-Khan, S., Siqueland, L., Dembiski, M., McCarthy, K. S., & Gallop, R. (2006). The psychometric properties of the MASC in a pediatric psychiatric sample. *Journal of Anxiety Disorders, 20*, 139–157. doi:10.1016/j.janxdis.2005.01.004

Sheras, P.L ., Abidin, R. R., & Konold, T. R. (1998). *Stress index for parents of adolescents (SIPA).* Lutz: Psychological Assessment Resources Inc.

Shields, A., & Cicchetti, D. (1997). Emotion regulation among school-age children: The development and validation of a new criterion Q-sort scale. *Developmental Psychology, 33*(6), 906–916. doi: 10.1037/0012-1649.33.6.906

Smilkstein, G., Ashworth, C., & Montano, D. (1982). Validity and reliability of the family APGAR as a test of family function. *The Journal of Family Practice, 15*(2), 303–311.

Spence, S. H., Barrett, P. M., & Turner, C. M. (2003). Psychometric properties of the Spence children's anxiety scale with young adolescents. *Journal of Anxiety Disorders, 17*(6), 605–625. doi:10.1016/S0887-6185(02)00236-0

Swanson, J. M., Schuck, S., Porter, M. M., Carlson, C., Hartman, C. A., Sergeant, J. A., . . . Wigal, T. (2012). Categorical and dimensional definitions and evaluations of symptoms of ADHD: History of the SNAP and the SWAN rating scales. *The International Journal of Educational and Psychological Assessment, 10*, 51–70.

Varni, J. W., Sherman, S. A., Burwinkle, T. M., Dickinson, P. E., & Dixon, P. (2004). The PedsQL™ family impact module: Preliminary reliability and validity. *Health and quality of life outcomes, 2*(1), 55.

Verhulst, F., & van der Ende, J. (2013). *Handleiding ASEBA, Vragenlijsten voor leeftijden 6 tot en met 18 jaar.* Rotterdam: ASEBA Nederland.

Verhulst, F. C., van der Ende, J., & Koot, H. M. (1997). *Manual for the teacher’s report form [in Dutch].* Rotterdam: Sophia Children’s Hospital, Erasmus MC.

Wallace, D. P., Harbeck-Weber, C., Whiteside, S. P. H., & Harrison, T. E. (2011). Adolescent Acceptance of Pain: Confirmatory Factor Analysis and Further Validation of the Chronic Pain Acceptance Questionnaire, *Adolescent Version. The Journal of Pain, 12*(5), 591–599. doi:10.1016/j.jpain.2010.11.004

Ware, J. E., & Sherbourne, C. D. (1992). The MOS 36-item short-form health survey (SF-36): I. conceptual framework and item selection. *Medical Care, 30*(6), 473–483. doi: 10.1097/00005650-199206000-00002

Wolters, P. L., Martin, S., Toledo-Tamula, M. A., Gillespie, A., Baldwin, A., & Widemann, B. (2013). *Quality of life of adolescents with neurofibromatosis type 1 (NF1) and plexiform neurofibromas (PNs): Reliability and validity of the impact of pediatric illness (IPI) Scale self-report form.* New Orleans, LA: The National Conference in Pediatric Psychology.
